# Supplementary material for: How do contextual factors influence quality and safety work in the Norwegian home care and nursing home settings? A qualitative study about managers’ experiences
Source: PubMed Central journal article supplement — BMJ Open. 2019 Jul 9;9(7):e025197. doi: 10.1136/bmjopen-2018-025197 (PMC6629381; doi:10.1136/bmjopen-2018-025197), 2019-07-09
Supplement: bmjopen-2018-025197.draft_revisions.pdf [file bmjopen-2018-025197.draft_revisions.pdf]

# BMJ Open

BMJ Open is committed to open peer review. As part of this commitment we make the peer review history of every article we publish publicly available.

When an article is published we post the peer reviewers' comments and the authors' responses online. We also post the versions of the paper that were used during peer review. These are the versions that the peer review comments apply to.

The versions of the paper that follow are the versions that were submitted during the peer review process. They are not the versions of record or the final published versions. They should not be cited or distributed as the published version of this manuscript.

BMJ Open is an open access journal and the full, final, typeset and author-corrected version of record of the manuscript is available on our site with no access controls, subscription charges or pay-per-view fees (<http://bmjopen.bmj.com>).

If you have any questions on BMJ Open's open peer review process please email [info.bmjopen@bmj.com](mailto:info.bmjopen@bmj.com)

# BMJ Open

**How do contextual factors influence quality and safety work  
in the Norwegian home care and nursing home settings?  
A qualitative study about managers' experiences**

|                               |                                                                                                                                                                                                                    |
|-------------------------------|--------------------------------------------------------------------------------------------------------------------------------------------------------------------------------------------------------------------|
| Journal:                      | <i>BMJ Open</i>                                                                                                                                                                                                    |
| Manuscript ID                 | bmjopen-2018-025197                                                                                                                                                                                                |
| Article Type:                 | Research                                                                                                                                                                                                           |
| Date Submitted by the Author: | 03-Jul-2018                                                                                                                                                                                                        |
| Complete List of Authors:     | Ree, Eline ; University of Stavanger , Faculty of Health Sciences<br>Johannessen, Terese ; University of Stavanger , Faculty of Health Sciences<br>Wiig, Siri; University of Stavanger, Faculty of Health Sciences |
| Keywords:                     | Quality in health care < HEALTH SERVICES ADMINISTRATION & MANAGEMENT, patient safety, context, PRIMARY CARE, home care, nursing homes                                                                              |
|                               |                                                                                                                                                                                                                    |

SCHOLARONE™  
Manuscripts

# How do contextual factors influence quality and safety work in the Norwegian home care and nursing home settings?

A qualitative study about managers' experiences

Eline Ree <sup>1,2</sup>, Terese Johannessen <sup>1</sup>, Siri Wiig <sup>1</sup>

<sup>1</sup> Faculty of Health Sciences, SHARE - Centre for Resilience in Healthcare, University of Stavanger, Stavanger, Norway

<sup>2</sup> Division of Physical Medicine and Rehabilitation, Vestfold Hospital Trust, Stavern, Norway

Corresponding Author:

Eline Ree <Eline.Ree@uis.no>

University of Stavanger, Kjell Arholms gate 39, 4021 Stavanger, Norway

Number of words: 4618

## Abstract

**Objective:** Although many contextual factors can facilitate or impede primary care managers' work with quality and safety, research on how these factors influences the managers' continuous improvement efforts is scarce. This study explored how primary care managers experience the impact of a variety of contextual factors on their daily quality and safety work.

**Design:** The study has a qualitative design. Nine semi-structured qualitative interviews were conducted at the participants' workplaces. Systematic Text Condensation was used for analysis.

**Setting:** Five nursing homes and three home care services in Norway.

**Participants:** Female primary care managers at different levels, working in different units and municipalities varying in size and location.

**Results:** The participants cited the lack of time and money as a significant impediment to quality and safety, and these resources had to be carefully allocated. They emphasized the importance of networks and competence for their quality and safety work. Delegation of responsibility among employees helped create engagement, improved competence, and ensured that new knowledge reached all employees. External guidelines and demands helped them to systematize their work and explain the necessity of quality and safety work to their employees, if they were compliant with daily clinical practice in the organization.

**Conclusions:** Numerous contextual factors influence the managers by determining the leeway that they have in quality and safety work, by setting the budgetary constraints and defining available competence, networks, and regulation. At first glance these factors appear fixed, but our findings underscore the importance of primary care managers acting upon and negotiating the environment in which they conduct their daily quality and safety work. More research is needed to understand how these managers strategize to overcome the impediments to quality and safety.

### Strengths and limitations of this study

- This study provide qualitative knowledge of the ways in which primary care managers' work with quality and safety despite contextual barriers.
- The samples of managers was diverse in terms of age, position, work experience, and type of unit (home care and nursing home).
- There was a range in the size and location of the municipalities and the units included in the study.
- The sample was small, but the participants had specific experiences about the study aim, providing sufficient information power and experiences that might be transferable to other primary healthcare settings.

**Keywords:** quality improvement, patient safety, context, primary care, nursing homes, home care

## INTRODUCTION

### Background

There is increased attention to quality and safety challenges and improvement initiatives in the primary care setting [1-3]. However, research has shown that the results of improvement initiatives are inconsistent and often limited [4]. One of the pitfalls is that what is successful in one setting might fail in another [1]. The impact of quality and safety initiatives depend on contextual factors in the healthcare settings [4, 5].

Context can be either inner/internal (e.g., organizational culture and implementation climate) or outer/external (e.g., laws and regulations, external policies, and funding structures) settings of an organization [6]. The range of contextual factors across healthcare settings can influence the implementation of interventions and whether and how they affect quality and safety outcomes [4, 5, 7].

Several frameworks for healthcare improvement, such as the Consolidated Framework for Implementation Research (CFIR) [5] and Promoting Action on Research Implementation in Health Services (PARISH) [8], are designed to help researchers and practitioners who implement and conduct quality and safety improvement initiatives, to identify contextual factors in their setting [5, 6, 9-11]. The frameworks are often based on research from specialized healthcare. In contrast to specialized care, research and knowledge about contextual factors in the primary care setting are limited.

In Norway, the municipalities are responsible for primary care, including nursing homes and home care, midwife, rehabilitation, physiotherapy, and after-hours emergency services. The municipalities are by law required to improve healthcare quality and safety. Managers at all service levels are responsible for planning, implementing, and evaluating the improvement efforts [2]. Thus, managers are important in the effort to improve quality and safety in primary healthcare. A variety of contextual factors can facilitate or hinder primary care managers' work. Most of the research on the role of contextual factors for quality and safety work is related to quality improvement interventions and implementation. It is important to explore how contextual factors affect managers' daily quality and safety work, whether they are implementing specific improvement interventions or not. Thus, more research is needed to explore which contextual factors are salient for daily quality and safety work in the primary care setting.

## **Aim and research question**

The purpose of this study is to generate new knowledge about the contextual factors that influence managers' quality and safety work in Norwegian home care and nursing homes. This study answered the following research question: How do contextual factors influence quality and safety work in the Norwegian home care and nursing home settings? By answering this question, the study contributes to a better understanding of quality and safety improvement processes in Norwegian primary care as it occurs in everyday work.

## **METHODS**

The study uses a qualitative explorative design [12].

### **Recruitment and sample**

We recruited a purposive sample of nine middle- and top-level managers in primary care. The sample includes managers from five municipalities, located in three counties in different regions of Norway. The selection criteria were based on diversity in managerial role, responsibility, and a variety of counties and municipalities, to ensure that the sample represented a variety in contextual settings. Our sample consisted of four managers from nursing homes, four from home care services, and one director of health and care services in a municipality. All participants were females aged 34-61 years, with three to 19 years of managerial experience. The municipalities, nursing homes, and home care services represented in our sample differ in size, location (urban/rural) and structure. The managerial levels span from the municipality level (one director of health and care services), followed by top managers of the nursing home and home care services (n=2), and department managers with personnel responsibility of one or several departments within the nursing homes and home care service (n=4). Also included in the sample are professional development nurses with responsibility for the daily operations within specific departments (n=2). They do not manage personnel and or have administrative responsibility.

Co-researchers from Center for Development of Institutional and Home Care services in two Norwegian municipalities recruited the participants through mail and telephone. The researchers then contacted the participants to establish a relationship, agree upon the time, and place for the interviews. The study is a part of the larger SAFE-LEAD project that aims at building leadership competence and guide primary care managers in their efforts to advance and improve vital quality and safety strategies, attitudes, and practices in their organizations.

1  
2  
3 The participants in the current study were recruited as a part of a first phase in the SAFE-  
4 LEAD project, to explore the role of contextual factors for quality and safety work in primary  
5 care (see Wiig et al. [13] for study protocol) and as a basis for intervention planning in the  
6 project. The participants were informed about the SAFE-LEAD project and the aim of the  
7 current study before participating.  
8  
9

### 10 11 **Data collection**

12 Data were drawn from semi-structured individual interviews of the nine managers. The  
13 interviews took place at the institutions where the managers worked and were carried out by  
14 the authors and co-researchers in the SAFE-LEAD project. The interview guide included open  
15 questions about managers' quality and safety work, and more specific questions on the  
16 importance of factors such as external demands, economy, and structure inspired by Bate et  
17 al.'s [14] Organizing for Quality framework. Each interview lasted for about 45 minutes.  
18 Only the researcher and the participant were present during the interview. The interviewer  
19 invited the managers to share experiences and tell stories about how different contextual  
20 factors affect their work with quality and safety. To decide on the sample size we assessed  
21 information power by considering the specificity of the research question, use of theory, the  
22 quality of the interviews and the analysis strategy [15]. The research question in our sample  
23 was specific addressing different contextual factors, and the sample was relevant to explore  
24 the question as it consisted of managers with different backgrounds from different counties  
25 and municipalities across Norway, in addition to varying managerial background and role  
26 from nursing homes, home care, and management levels. Most interviews were information-  
27 rich, providing numerous perspectives and nuances on how different contextual factors  
28 influence the managers' work with quality and safety. After nine interviews, we found  
29 sufficient information power for a responsible analysis to explore our study question. The  
30 interviews were audio-recorded, encrypted and transcribed by the authors and co-researchers.  
31 The names of all participants were removed from their statements prior to transcription.  
32  
33  
34  
35  
36  
37  
38  
39  
40  
41  
42  
43  
44  
45

### 46 **Analysis**

47 To analyze the data, we used Systematic Text Condensation (STC), a thematic, cross-case  
48 analysis strategy [16]. The analysis comprised four steps: (1) reading the transcribed  
49 interviews to obtain a sense of the material and identify preliminary themes, (2) developing  
50 code groups based on the preliminary themes and identify units of meaning related to each  
51 code group, (3) establishing sub-groups in the code groups and condensing the content in each  
52 code group, (4) synthesizing the content in each code group to reconceptualized  
53  
54  
55  
56  
57  
58  
59  
60

1  
2  
3 descriptions of how contextual factors influence the participants' work with quality and  
4 safety.  
5

6  
7 In step 1, all project members involved in the data collection, including co-researchers,  
8 participated in identifying the preliminary themes. ER and TJ completed the analysis in steps  
9 2-4 with input and discussion with SW.  
10

### 11 12 **Ethics**

13  
14 The Regional Committees for Research Ethics in Norway found that the study was not  
15 regulated by the Health Research Act. The Norwegian Social Science Data Services approved  
16 the study (NSD, ID 52324). The study followed the Helsinki Declaration, and all participants  
17 gave their written informed consent.  
18  
19

### 20 21 **Patient and public involvement**

22  
23 Patients were not involved in this study, but patients' and their next-of-kin's perspectives are  
24 central to the SAFE-LEAD project [13]. Patients, service users, and next-of-kin  
25 representatives participated in the SAFE-LEAD project development, and collaborated with  
26 the project team as co-researchers throughout the project period, including recruitment, data  
27 collection, analysis, and dissemination. The results will be disseminated to the participating  
28 units through oral presentations, and as a published article.  
29  
30  
31  
32

### 33 34 **RESULTS**

35  
36 Analysis revealed relevant perspectives on how contextual factors influence managers'  
37 quality and safety work in nursing homes and home care and how managers maneuver in their  
38 work practice to accomplish their tasks. The participants stated that lack of time and money  
39 interfered with their work with quality and safety, and that these resources required careful  
40 allocation. They also emphasized the importance of networks and competence. Delegation of  
41 responsibility among employees helped create motivation, engagement and improved  
42 competence in quality and safety work, and ensured that new knowledge reached all  
43 employees. External guidelines and demands helped to systematize their work and legitimize  
44 the necessity of quality and safety work to their employees, if they were in accordance with  
45 daily clinical practice in the organization. These findings will be elaborated below. Quotations  
46 are assigned pseudonyms.  
47  
48  
49  
50  
51  
52  
53  
54  
55  
56  
57  
58  
59  
60



1  
2  
3 **Lack of resources is a major barrier for managers' work with quality and safety and**  
4 **requires careful prioritization**  
5

6  
7 Many participants mentioned lack of time and money as important barriers to quality and  
8 safety work. Many participants stated that they did not have enough time to comply with the  
9 legal requirements, for example regarding documentation, reporting, and patient follow-up.  
10 Some said that the time spend on documentation and the need for cost saving often came at  
11 the expense of both patient care and quality and safety work. We should be able to take care  
12 of patients and stay within the budget, they said. Money was tight and there was little  
13 available for anything outside of daily operations. One participant said that their unit had  
14 \$2390 to spend on the health, safety and working environment, but a person lift alone costs  
15 \$2014. Many participants observed that staffing was difficult and that they could not hire  
16 temporary personnel for night shifts. Nor did they have the funds to purchase the systems they  
17 wanted. The participants wanted a slightly larger budget so that they could add a few more  
18 hours each month in order to meet the demands of their quality and safety work. A manager in  
19 a small rural municipality expressed it as follows:  
20  
21  
22  
23  
24  
25  
26  
27

28  
29 “There is limited time for care. The other things are also important, but when one is  
30 given more and more tasks and fewer resources, some things clash, and then it is only  
31 half done”. (Director of health and care services).  
32  
33

34 Several of the participants emphasized that despite being under-resourced, they got a great  
35 deal done because they were good at allocating resources. They made the best use of their  
36 personnel, such as allowing an employee to work with care plans by moving tasks from that  
37 employee to another. Some participants told they had to work systematically with the  
38 resources that they had and to set realistic goals. For example, they were not able to hold large  
39 professional seminars as often as they liked, so instead they concentrated on quality and safety  
40 in the day-to-day care work. A few of the participants stated that despite operating deficits in  
41 the municipalities, they had their budgets and their employees, and thus it did not cost more or  
42 less, but depended on themselves initiating the quality and safety improvement efforts. Many  
43 emphasized the importance of working creatively within the economic scope they had. As  
44 long as they adhered to the total budget, they could use funds as they saw fit. For example,  
45 one of the participants said that based on complaints from patients and next of kin in one  
46 department, they bought furniture and flowers with money that had actually been reserved for  
47 another department that did not need it. It was all about doing the right things at the right  
48  
49  
50  
51  
52  
53  
54  
55  
56  
57  
58  
59  
60

1  
2  
3 time, as illustrated by a quote from a participant working at a short-term rehabilitation and  
4 palliative care department:  
5

6 “Sometimes I think this intervention could be good, but then there is so much else  
7 going on in the department that it is not the right time to do it. You have to pick your  
8 fights carefully. The right actions in the right time”. (Department manager, nursing  
9 home).  
10  
11  
12  
13

#### 14 **Access to networks play an important role in the quality and safety work**

  
15

16 Several of the participants reiterated the importance of networks and support for professional  
17 and academic development. We are not born managers, one of them said, and many others  
18 stressed the need for professional input, more and better skills and competence in quality and  
19 safety work, and someone to offer encouragement. They reported several ways of working  
20 with competence development in their unit or department, such as hosting in-house seminars  
21 and workshops with quality and safety work on the agenda. Others had brought all of the unit  
22 managers together to collaborate on quality and safety issues. One of the participants said that  
23 in their last manager meeting they discussed how to handle aggressive patients. The solution  
24 was to give some of the staff special training.  
25  
26  
27  
28  
29  
30

31 The participants also stressed the importance of support from networks and resource persons  
32 in the municipality, such as professional development nurses, nursing home doctors, and the  
33 Center for Development of Institutional and Home Care Services in each county. The nursing  
34 home doctor led the dialogue with patients/users and next of kin, and was an important  
35 discussion partner when it came to quality and safety challenges. The nursing home doctor  
36 was also responsible for much of the in-house teaching and new employee training. The  
37 professional development nurse was a driving force in quality improvement that kept the  
38 managers up-to-date. Most of the participants had an interdepartmental quality committee,  
39 with professional development nurses under supervision of the District Medical Officer in the  
40 municipality (the highest-ranked doctor in the municipal structure). However, sometimes the  
41 committee proposed too many activities that took time away from their daily work, resulting  
42 in time pressure and stress. When this happened, the committee became more of a burden than  
43 a support, they said. The participants did note the value of having support services such as  
44 physiotherapists, ergonomics, psychiatry and the medical center nearby, and some even had it  
45 in the same building. During a busy workday, this was a timesaver for participants who could  
46 just stop by as needed. Likewise, the informal meeting arenas between the unit managers,  
47  
48  
49  
50  
51  
52  
53  
54  
55  
56  
57  
58  
59  
60

1  
2  
3 such as meeting for lunch or coffee was an important support. A participant with 10 years of  
4 experience as a healthcare manager describes the importance of collaborating with other  
5 managers and employees:  
6  
7

8 “I believe that we have to work together. As a manager, I can have the vision, but  
9 when I, as a manager, am responsible for the shifts and many other things, it is  
10 important for someone else to pull me up so that we can discuss things”. (Department  
11 manager, nursing home).  
12  
13  
14

### 15 **Delegation of responsibility ensures that new knowledge reaches the employees**

16  
17  
18 The participants mentioned the delegation of roles and responsibility to employees as  
19 important to create motivation, engagement and improved competence in quality and safety  
20 work. Since the participants did not have the capacity to teach all of the employees how to  
21 implement new procedures, they gave employees responsibility for different areas. The  
22 participants then facilitated and made sure that the employees got time to take courses and  
23 training in their areas of responsibility. To get responsibility for an area, the employee had to  
24 communicate well with his/her colleagues, take courses, keep updated and introduce new  
25 competences and routines to the department. Several participants said they were confident in  
26 knowing that there was a person with special competence in a certain area. One participant  
27 stated that it was not the manager but the employees who were the experts, because they were  
28 on the floor every day. In this connection, several mentioned the importance of having a  
29 highly qualified professional staff. Many participants had put together a resource group to  
30 work on new routines and interventions, which were then discussed in the quality committee.  
31 For example, one participant told that they lacked a clear routine regarding the rinsing rooms,  
32 and then challenged the hygiene group to make a proposal. The participants also stressed the  
33 importance of engaging the employees from the beginning when implementing something.  
34 For example, they encountered resistance when patients wanted to change a mealtime from  
35 afternoon to midday. The managers then had to collaborate with the employees, give them  
36 more time, and work with attitudes and information to ensure that the employees accepted the  
37 change. As one participant said, change cannot be imposed from the top but has to be driven  
38 from the bottom. The director of health and care services in a small municipality reiterated the  
39 importance of giving employees an area of responsibility:  
40  
41  
42  
43  
44  
45  
46  
47  
48  
49  
50  
51  
52  
53

54 “Most have their area of responsibility. It is nutrition, medical reviews, palliative care,  
55 diabetes. As such, the vast majority have their area, but we try to give them an area of  
56  
57  
58  
59

1  
2  
3 interest. And then we see that it becomes engagement around this". (Director of Health  
4 and Care Services).

5  
6  
7 Despite making the best use of the resources at hand, the participants stressed the problem  
8 posed by the lack of proper professional competence. One participant had worked in a  
9 hospital setting before, where she could consult with an outpatient clinic nearby, but such  
10 services were nonexistent in the municipalities. Many participants said they strived to have  
11 the right competence at the right place, for instance, not assigning medical tasks to assistants.  
12 Some considered not using assistants at all in home care services. However, when many  
13 employees were out on sick leave it was harder to get nurses or healthcare workers instead of  
14 assistants to take extra shifts. This was a serious problem, they said, since the assistants did  
15 not know the routine. A few participants even stressed the importance of having  
16 professionally trained staff, insisting that it was unacceptable to have only unskilled workers  
17 on duty. One of the participants recounted an incident in which an assistant had failed to  
18 notice that a patient was having difficulty breathing. The assistant mistakenly believed that  
19 eating blueberries had turned the patient's lips blue. Several participants wanted to replace  
20 some of the assistants with nurses who were capable of handling most of the departmental  
21 tasks. There was a problem, however, with recruiting nurses, especially for temporary  
22 positions, as shown in a quote from a manager who had worked in the same nursing home for  
23 18 years:

24  
25  
26  
27  
28  
29  
30  
31  
32  
33  
34  
35 "Nurses do not grow on trees, so to speak. It's hard to recruit. September last year was  
36 the first time since I started as a manager that we had full nursing coverage (...). But it  
37 did not last long. Things happen all the time. If we lose nurses, we also lose the  
38 competence they have. And then one must start all over again". (Nursing home  
39 manager).

#### 40 41 42 43 44 **External demands can facilitate oversight and a systematic approach in improvement** 45 **work if they are in accordance with daily clinical practice in the organization**

46  
47  
48 Participants reported that external demands such as national guidelines and regulations  
49 contributed to systematize their work, and justified the necessity of the quality and safety  
50 work. They explained the benefits of the national patient safety program, dashboard meetings,  
51 ethical reflection, and development of checklists. Some pointed out that working with  
52 checklists was demanding but necessary for high-quality service provision. Furthermore,  
53 structured documentation was necessary to show the local politicians that they had tried  
54  
55  
56  
57  
58  
59  
60

1  
2  
3 everything else, and was often the only way to make their elected officials understand their  
4 needs and allocate more resources, they said.  
5

6  
7 When governmental white papers were specific i.e. stated what skills would most likely be  
8 needed in the future, the participants found it easier to act upon it. They experienced greater  
9 understanding among local politicians, employees, and users when they had support from  
10 white papers and reports. For example regarding changes in the use of health technology, the  
11 participants experienced increased compliance among employees when they could cite a  
12 white paper. A participant working in a large rural home care explained how implementation  
13 of new guidelines anchored in a white paper helped her focus on quality improvement:  
14  
15  
16  
17

18  
19 “I feel it helps me a lot that it is decided from the top level [Parliament] that Norway  
20 wants it that way. That’s true. Yes, we just have to adjust and then change practice  
21 according to this. Now it is decided that the patient shall receive more [services], and  
22 then we have to work towards it and help employees to cope with these changes”.  
23  
24 (Department manager, home care).  
25  
26

27  
28 The participants stated that political decisions in the municipality and administration affected  
29 them because there were not enough resources and a lack of understanding of what was  
30 required. Participants talked about the mismatch between legal requirements and daily  
31 practice and the contextual factors at their workplace, which could lead to misunderstandings  
32 and substandard quality. For example, some participants reported that the municipality wanted  
33 consistent standard procedures for medication throughout the municipality so that it would be  
34 easier to rotate employees. However, the participants did not find it useful since each unit had  
35 its own routine. Some said they would like to meet the politicians to talk about how they did  
36 their daily work “on the shop floor” which was often quite different from what the politicians  
37 imagined. The participants expressed that politicians should be better informed about what is  
38 happening in the clinical practice, not promising too much, but rather have an open door and  
39 listen to arguments. Many stated that there is a need for more qualified professionals in the  
40 future to work smarter and more efficiently, and that politicians have to say something about  
41 what to do less of. A participant working in a middle-sized urban nursing home expressed this  
42 as follows:  
43  
44  
45  
46  
47  
48  
49  
50  
51

52  
53 “I wish the politicians were clear about what they really expect and what to achieve to  
54 ensure the quality they seek. I feel that if a politician says something, others are just  
55 jumping after”. (Nursing home manager)  
56  
57  
58  
59  
60

## DISCUSSION

Our analysis demonstrated that lack of resources is a major barrier for managers' quality and safety work, and requires careful prioritizing. Access to networks and necessary competence play an important role in quality and safety work, and delegation of responsibility ensures that new knowledge reaches all employees. External guidelines and demands help to systematize managers' quality and safety work, as long as they are in accordance with daily clinical practice in the organization. Below, we discuss the impact of these findings and the strengths and limitations of our study design.

The contextual factors that the managers in our study emphasized as important for quality and safety work are similar to those reported in other studies, reviews and implementation frameworks [1, 5, 6, 17, 18]. However, we explore the role of contextual factors in relation to managers' daily quality and safety work, not specifically according to quality improvement initiatives. Most of the previous research on quality and safety work in healthcare was conducted in hospitals [3, 19]. Our study explores the perspectives of managers at different levels in the primary care setting, including units varying in size and location. Furthermore, most previous studies are either quantitative, or reviews of quantitative studies [4]. Our study adds new qualitative knowledge regarding *how* managers in primary care find different contextual factors influencing their quality and safety work, and how they shape the context in which they work. This shows that context is not independent from the actors within the different primary care units, but is actually something that can be changed, acted upon and negotiated to improve the environmental conditions for quality and safety. Rosness et al. [20] describes this as a "sender-receiver metaphor" in which managers can be considered as actors who may resist, co-create or re-create the environmental conditions for their own quality and safety work.

Our findings are in accordance with those in the systematic review by Kaplan et al. [4], who found that associations between funding and quality improvement were often not significant. In light of our findings, this might be because managers' ability to prioritize the available resources is more important than the resources themselves. Our findings indicate that managers' strategies and skills in prioritizing resources, partly by involving and listening to their staff's opinions on how resources should be used, are more important than the actual amount of resources available. The importance of managers' capabilities to change, negotiate, or act upon their context is also revealed in our findings about how managers delegated

1  
2  
3 responsibility for specific fields to different employees, ensuring motivation and knowledge  
4 sharing among staff. The managers' role in acting upon their surrounding context was also  
5 evident in their interaction with politicians, and the way they used the local budget to fit their  
6 needs. This is consistent with Bovenkamp et al. [21] who use the concept of institutional work  
7 when describing how managers both influence and are influenced by their institutional  
8 context.  
9  
10  
11  
12

13 Many studies about the role of contextual factors for quality and safety improvement have  
14 found that external guidelines and demands are important factors [5, 18, 22]. The absence of  
15 such guidelines is an impediment to the implementation of improvement interventions [18].  
16 The current study adds to this body of knowledge, by showing that external guidelines and  
17 demands should be consistent with daily clinical practice in the organization to contribute to  
18 the managers' quality and safety work. Carlford et al. [22] also found that routines should be  
19 taken into account when incorporating new methods, guidelines or tools into primary health  
20 care to ensure compatibility.  
21  
22  
23  
24  
25  
26

### 27 **Strengths and limitations**

28  
29 This study context could have resulted in positive response bias, especially regarding  
30 individual factors in which the managers have a responsibility and a possibility to influence.  
31 However, we highlighted that the purpose of our study was not to evaluate their quality and  
32 safety practices, but to generate knowledge of contextual factors important for their daily  
33 quality and safety work.  
34  
35  
36  
37

38 Despite the small sample, the participants had specific experiences and perceptions about the  
39 research question, which provided rich data and sufficient information power [15]. Our  
40 sample was diverse in age, position, work experience, type of unit (home care and nursing  
41 home), the size and location of both the municipalities and the units in which the managers  
42 worked. This diversity brought a range of perspectives and nuances to the data. We did not  
43 include employees, who might have held opinions that differed from the managers'. We  
44 limited the scope of our study to managers because they have the main responsibility for daily  
45 quality and safety practices. We recommend that further studies explore employees'  
46 perspectives.  
47  
48  
49  
50  
51  
52

53 Given the qualitative nature of our study, the list of important contextual factors addressed is  
54 not exhaustive. However, the factors described are in accordance with other studies of the role  
55  
56  
57  
58

1  
2  
3 of contextual factors for quality and safety work, illustrating that these factors are found  
4 across settings and samples. Thus the contextual factors described by the participants as  
5 promoting or inhibiting their quality work are probably transferable to other units and  
6 healthcare services.  
7  
8

## 9 10 **Conclusions and implications**

11  
12 This study shows how contextual factors influence quality and safety work. The findings  
13 indicate that managers play an important role in acting upon and negotiating the contextual  
14 environment in which their daily quality and safety work are carried out. The healthcare  
15 sector is in constantly pressure of time and limited resources, and some units might be better  
16 than others at making the best use of these limited resources, for quality work. Through this  
17 study, we have generated knowledge on how contextual factors might influence the way in  
18 which managers perform high-quality work despite contextual barriers, and how they are  
19 actors in shaping the context in which they work. Such knowledge can be useful to other  
20 primary care units, and to other healthcare services. Research on quality and safety work in  
21 the Norwegian primary care context is still limited, and more studies should be conducted to  
22 explore how managers and employees in the primary care setting act upon their contextual  
23 environment and shape the context in favor of care quality and safety.  
24  
25

26  
27 Qualitative studies can contribute to a more complete understanding of how context influence  
28 quality and safety work, and how healthcare units can manage contextual barriers at the local  
29 level. Knowledge of these issues is important for understanding daily work practices, for  
30 identifying possible barriers and facilitators, and when preparing and conducting  
31 improvement interventions, to increase the probability of sustainable and transferable effects  
32 of improvement efforts.  
33  
34

## 35 36 **DECLARATIONS**

### 37 38 **Competing interests**

39 The authors declare that they have no competing interests.  
40  
41

### 42 43 **Funding**

44  
45 The work is part of the project Improving Quality and Safety in Primary Care – Implementing  
46 a Leadership Intervention in Nursing Homes and Homecare (SAFE-LEAD Primary Care),  
47 which has received funding from the Research Council of Norway's program HELSEVEL,  
48 under grant agreement 256681/H10, and the University of Stavanger.  
49  
50



### Authors' contributions

All authors contributed to the conception and design of the manuscript. TJ collected the data, together with other researchers (Lene Schibeveag and Torunn Strømme) and a co-researcher (Berit Ullebust) in the SAFE-LEAD project. ER and TJ conducted the systematic text condensation analysis, although SW was involved in step 1 of the analysis, in addition to discussion and refining of the results. ER made the first draft of the manuscript, while TJ and SW have critically reviewed and revised the subsequent drafts. All authors read and approved the final manuscript.

### Acknowledgement

We thank all participants in the study for sharing their knowledge and experiences with us.

We acknowledge the following members of the SAFE-LEAD Primary Care team for participating with discussion on the first step of analysis: Karina Aase, Torunn Strømme, Lene Schibeveag, Berit Ullebust, Line Hurup Thomsen, and Elisabeth Holen-Rabbersvik. Special thanks to Torunn Strømme, Lene Schibeveag, and Berit Ullebust for their contribution with data collection.

### Availability of data and material

Anonymized data of the study will be stored at the Norwegian Social Science Data Services until the project is completed, and will then be available on request.

### REFERENCES

1. Krein SL, Damschroder LJ, Kowalski CP, et al. The influence of organizational context on quality improvement and patient safety efforts in infection prevention: a multi-center qualitative study. *Soc Science Med.* 2010;71(9):1692-701.
2. Ministry of Health and Care Services. Meld. St. 26 (2014-2015) Fremtidens primærhelsetjeneste – nærhet og helhet. Oslo: Ministry of Health and Care Services; 2014.
3. Vincent C, Amalberti R. Safer healthcare. London: Springer Open 2016.
4. Kaplan HC, Brady PW, Dritz MC, et al. The influence of context on quality improvement success in health care: a systematic review of the literature. *Milbank Q.* 2010;88(4):500-59.
5. Damschroder LJ, Aron DC, Keith RE, et al. Fostering implementation of health services research findings into practice: a consolidated framework for advancing implementation science. *Implement Sci.* 2009; doi:10.1186/1748-5908-4-50.
6. McDonald KM. Considering context in quality improvement interventions and implementation: concepts, frameworks, and application. *Acad pediatr.* 2013;13(6):S45-S53.
7. Øvretveit J. Understanding the conditions for improvement: research to discover which

- context influences affect improvement success. *BMJ Qual Saf*. 2011; doi:10.1136/bmjqs.2010.045955.
8. Rycroft-Malone J. The PARIHS framework—A framework for guiding the implementation of evidence-based practice. *J Nurs Care Qual*. 2004;19(4):297-304.
  9. Birken SA, Powell BJ, Presseau J, et al. Combined use of the Consolidated Framework for Implementation Research (CFIR) and the Theoretical Domains Framework (TDF): a systematic review. *Implement Sci*. 2017; doi:10.1186/s13012-016-0534-z.
  10. Glasgow RE, Vogt TM, Boles SM. Evaluating the public health impact of health promotion interventions: the RE-AIM framework. *Am J Public Health*. 1999;89(9):1322-7.
  11. Pfadenhauer LM, Gerhardus A, Mozygemba K, et al. Making sense of complexity in context and implementation: the Context and Implementation of Complex Interventions (CICI) framework. *Implement Sci*. 2017; doi:10.1186/s13012-017-0552-5.
  12. Malterud K. *Kvalitative metoder i medisinsk forskning. En innføring*. 3 ed. Oslo: Universitetsforlaget 2009.
  13. Wiig S, Ree E, Johannessen T, et al. Improving quality and safety in nursing homes and home care: the study protocol of a mixed-methods research design to implement a leadership intervention. *BMJ Open*. 2018; doi: 10.1136/bmjopen-2017-020933.
  14. Bate P, Mendel P, Robert G. *Organizing for quality: the improvement journeys of leading hospitals in Europe and the United States*: Radcliffe Publishing 2008.
  15. Malterud K, Siersma VD, Guassora AD. Sample size in qualitative interview studies: guided by information power. *Qual Health Res*. 2016;26(13):1753-60.
  16. Malterud K. Systematic text condensation: a strategy for qualitative analysis. *Scand J Pub Health*. 2012;40(8):795-805.
  17. Kaplan H, Provost L, Froehle C, et al. The Model for Understanding Success in Quality (MUSIQ): building a theory of context in healthcare quality improvement. *BMJ Qual Saf*. 2011;21.
  18. Gjesten MT, Wiig S, Testad I. What are the key contextual factors when preparing for successful implementation of assistive living technology in primary elderly care? A case study from Norway. *BMJ Open*. 2017; doi:10.1136/bmjopen-2016-015455.
  19. Jha A, Prasopa-Plaizier N, Larizgoitia I, et al. Patient safety research: an overview of the global evidence. *Qual Saf Health Care*. 2010;19(1):42-7.
  20. Rosness R, Blakstad HC, Forseth U, et al. Environmental conditions for safety work—Theoretical foundations. *Saf Sci*. 2012;50(10):1967-76.
  21. van de Bovenkamp HM, Stoopendaal A, Bal R. Working with layers: The governance and regulation of healthcare quality in an institutionally layered system. *Public Policy and Administration*. 2017;32(1):45-65.
  22. Carlffjord S, Lindberg M, Bendtsen P, Nilsen P, Andersson A. Key factors influencing adoption of an innovation in primary health care: a qualitative study based on implementation theory. *BMC Fam Pract*. 2010; doi:10.1186/1471-2296-11-60.

## COREQ (COnsolidated criteria for REporting Qualitative research) Checklist

A checklist of items that should be included in reports of qualitative research. You must report the page number in your manuscript where you consider each of the items listed in this checklist. If you have not included this information, either revise your manuscript accordingly before submitting or note N/A.

| Topic                                          | Item No. | Guide Questions/Description                                                                                                                              | Reported on Page No. |
|------------------------------------------------|----------|----------------------------------------------------------------------------------------------------------------------------------------------------------|----------------------|
| <b>Domain 1: Research team and reflexivity</b> |          |                                                                                                                                                          |                      |
| <i>Personal characteristics</i>                |          |                                                                                                                                                          |                      |
| Interviewer/facilitator                        | 1        | Which author/s conducted the interview or focus group?                                                                                                   |                      |
| Credentials                                    | 2        | What were the researcher's credentials? E.g. PhD, MD                                                                                                     |                      |
| Occupation                                     | 3        | What was their occupation at the time of the study?                                                                                                      |                      |
| Gender                                         | 4        | Was the researcher male or female?                                                                                                                       |                      |
| Experience and training                        | 5        | What experience or training did the researcher have?                                                                                                     |                      |
| <i>Relationship with participants</i>          |          |                                                                                                                                                          |                      |
| Relationship established                       | 6        | Was a relationship established prior to study commencement?                                                                                              |                      |
| Participant knowledge of the interviewer       | 7        | What did the participants know about the researcher? e.g. personal goals, reasons for doing the research                                                 |                      |
| Interviewer characteristics                    | 8        | What characteristics were reported about the interviewer/facilitator? e.g. Bias, assumptions, reasons and interests in the research topic                |                      |
| <b>Domain 2: Study design</b>                  |          |                                                                                                                                                          |                      |
| <i>Theoretical framework</i>                   |          |                                                                                                                                                          |                      |
| Methodological orientation and Theory          | 9        | What methodological orientation was stated to underpin the study? e.g. grounded theory, discourse analysis, ethnography, phenomenology, content analysis |                      |
| <i>Participant selection</i>                   |          |                                                                                                                                                          |                      |
| Sampling                                       | 10       | How were participants selected? e.g. purposive, convenience, consecutive, snowball                                                                       |                      |
| Method of approach                             | 11       | How were participants approached? e.g. face-to-face, telephone, mail, email                                                                              |                      |
| Sample size                                    | 12       | How many participants were in the study?                                                                                                                 |                      |
| Non-participation                              | 13       | How many people refused to participate or dropped out? Reasons?                                                                                          |                      |
| <i>Setting</i>                                 |          |                                                                                                                                                          |                      |
| Setting of data collection                     | 14       | Where was the data collected? e.g. home, clinic, workplace                                                                                               |                      |
| Presence of non-participants                   | 15       | Was anyone else present besides the participants and researchers?                                                                                        |                      |
| Description of sample                          | 16       | What are the important characteristics of the sample? e.g. demographic data, date                                                                        |                      |
| <i>Data collection</i>                         |          |                                                                                                                                                          |                      |
| Interview guide                                | 17       | Were questions, prompts, guides provided by the authors? Was it pilot tested?                                                                            |                      |
| Repeat interviews                              | 18       | Were repeat interviews carried out? If yes, how many?                                                                                                    |                      |
| Audio/visual recording                         | 19       | Did the research use audio or visual recording to collect the data?                                                                                      |                      |
| Field notes                                    | 20       | Were field notes made during and/or after the interview or focus group?                                                                                  |                      |
| Duration                                       | 21       | What was the duration of the interviews or focus group?                                                                                                  |                      |
| Data saturation                                | 22       | Was data saturation discussed?                                                                                                                           |                      |
| Transcripts returned                           | 23       | Were transcripts returned to participants for comment and/or                                                                                             |                      |

| Topic                                  | Item No. | Guide Questions/Description                                                                                                        | Reported on Page No. |
|----------------------------------------|----------|------------------------------------------------------------------------------------------------------------------------------------|----------------------|
|                                        |          | correction?                                                                                                                        |                      |
| <b>Domain 3: analysis and findings</b> |          |                                                                                                                                    |                      |
| <i>Data analysis</i>                   |          |                                                                                                                                    |                      |
| Number of data coders                  | 24       | How many data coders coded the data?                                                                                               |                      |
| Description of the coding tree         | 25       | Did authors provide a description of the coding tree?                                                                              |                      |
| Derivation of themes                   | 26       | Were themes identified in advance or derived from the data?                                                                        |                      |
| Software                               | 27       | What software, if applicable, was used to manage the data?                                                                         |                      |
| Participant checking                   | 28       | Did participants provide feedback on the findings?                                                                                 |                      |
| <i>Reporting</i>                       |          |                                                                                                                                    |                      |
| Quotations presented                   | 29       | Were participant quotations presented to illustrate the themes/findings?<br>Was each quotation identified? e.g. participant number |                      |
| Data and findings consistent           | 30       | Was there consistency between the data presented and the findings?                                                                 |                      |
| Clarity of major themes                | 31       | Were major themes clearly presented in the findings?                                                                               |                      |
| Clarity of minor themes                | 32       | Is there a description of diverse cases or discussion of minor themes?                                                             |                      |

Developed from: Tong A, Sainsbury P, Craig J. Consolidated criteria for reporting qualitative research (COREQ): a 32-item checklist for interviews and focus groups. *International Journal for Quality in Health Care*. 2007. Volume 19, Number 6: pp. 349 – 357

**Once you have completed this checklist, please save a copy and upload it as part of your submission. DO NOT include this checklist as part of the main manuscript document. It must be uploaded as a separate file.**

# BMJ Open

**How do contextual factors influence quality and safety work  
in the Norwegian home care and nursing home settings?  
A qualitative study about managers' experiences**

|                                 |                                                                                                                                                                                                                    |
|---------------------------------|--------------------------------------------------------------------------------------------------------------------------------------------------------------------------------------------------------------------|
| Journal:                        | <i>BMJ Open</i>                                                                                                                                                                                                    |
| Manuscript ID                   | bmjopen-2018-025197.R1                                                                                                                                                                                             |
| Article Type:                   | Research                                                                                                                                                                                                           |
| Date Submitted by the Author:   | 14-Mar-2019                                                                                                                                                                                                        |
| Complete List of Authors:       | Ree, Eline ; University of Stavanger , Faculty of Health Sciences<br>Johannessen, Terese ; University of Stavanger , Faculty of Health Sciences<br>Wiig, Siri; University of Stavanger, Faculty of Health Sciences |
| <b>Primary Subject Heading</b>: | Health services research                                                                                                                                                                                           |
| Secondary Subject Heading:      | Qualitative research, Nursing, Health services research                                                                                                                                                            |
| Keywords:                       | Quality in health care < HEALTH SERVICES ADMINISTRATION & MANAGEMENT, patient safety, context, PRIMARY CARE, home care, nursing homes                                                                              |
|                                 |                                                                                                                                                                                                                    |

SCHOLARONE™  
Manuscripts

# How do contextual factors influence quality and safety work in the Norwegian home care and nursing home settings?

A qualitative study about managers' experiences

Eline Ree <sup>1,2</sup>, Terese Johannessen <sup>1</sup>, Siri Wiig <sup>1</sup>

<sup>1</sup> Faculty of Health Sciences, SHARE - Centre for Resilience in Healthcare, University of Stavanger, Stavanger, Norway

<sup>2</sup> Division of Physical Medicine and Rehabilitation, Vestfold Hospital Trust, Stavern, Norway

Corresponding Author:

Eline Ree <Eline.Ree@uis.no>

University of Stavanger, Kjell Arholms gate 39, 4021 Stavanger, Norway

Number of words: 4951

## Abstract

**Objective:** Although many contextual factors can facilitate or impede primary care managers' work with quality and safety, research on how these factors influences the managers' continuous improvement efforts is scarce. This study explored how primary care managers experience the impact of a variety of contextual factors on their daily quality and safety work.

**Design:** The study has a qualitative design. Nine semi-structured qualitative interviews were conducted at the participants' workplaces. Systematic Text Condensation was used for analysis.

**Setting:** Five nursing homes and three home care services in Norway.

**Participants:** Female primary care managers at different levels, working in different units and municipalities varying in size and location.

**Results:** The participants cited the lack of time and money as a significant impediment to quality and safety, and these resources had to be carefully allocated. They emphasized the importance of networks and competence for their quality and safety work. Delegation of responsibility among employees helped create engagement, improved competence, and ensured that new knowledge reached all employees. External guidelines and demands helped them to systematize their work and explain the necessity of quality and safety work to their employees, if they were compliant with daily clinical practice in the organization.

**Conclusions:** Numerous contextual factors influence the managers by determining the leeway that they have in quality and safety work, by setting the budgetary constraints and defining available competence, networks, and regulation. At first glance these factors appear fixed, but our findings underscore the importance of primary care managers acting upon and negotiating the environment in which they conduct their daily quality and safety work. More research is needed to understand how these managers strategize to overcome the impediments to quality and safety.

### Strengths and limitations of this study

- Semi-structured interviews provided in-depth qualitative knowledge of primary care managers' perspectives.
- The study sample is diverse in terms of age, position, work experience, and type of unit (home care and nursing home).
- The sample was small, but provided sufficient information power and experiences that might be transferable to other primary healthcare settings.
- Data collection was conducted by several researchers with different backgrounds and perspectives.
- Analyst triangulation was applied in analyzing the data to ensure trustworthiness.

**Keywords:** quality improvement, patient safety, context, primary care, nursing homes, home care

## INTRODUCTION

### Background

There is increased attention to quality and safety challenges (e.g., medication errors, lack of resources and competence, lack of continuity) and improvement initiatives (e.g., national patient safety campaigns) in the primary care setting [1-3]. However, research has shown that the results of improvement initiatives are inconsistent and often limited [4]. One of the pitfalls is that what is successful in one setting might fail in another [1]. The impact of quality and safety initiatives depend on contextual factors in the healthcare settings [4, 5].

Context can be either inner/internal (e.g., organizational culture and implementation climate) or outer/external (e.g., laws and regulations, external policies, and funding structures) settings of an organization [6]. The range of contextual factors across healthcare settings can influence the implementation of interventions and whether and how they affect quality and safety outcomes [4, 5, 7].

Several frameworks for healthcare improvement, such as the Consolidated Framework for Implementation Research (CFIR) [5] and Promoting Action on Research Implementation in Health Services (PARISH) [8], are designed to help researchers and practitioners who implement and conduct quality and safety improvement initiatives, to identify contextual factors in their setting [5, 6, 9-11]. The frameworks are often based on research from specialized healthcare. In contrast to specialized care, research and knowledge about contextual factors in the primary care setting are limited.

In Norway, the municipalities are responsible for primary care, including nursing homes and home care, midwife, rehabilitation, physiotherapy, and after-hours emergency services. The municipalities are by law required to improve healthcare quality and safety. Managers at all service levels are responsible for planning, implementing, and evaluating the improvement efforts [2]. Thus, managers are important in the effort to improve quality and safety in primary healthcare. A variety of contextual factors can facilitate or hinder primary care managers' work, such as external policies and incentives, the organizational culture, available resources, and access to social networks [5, 6]. Most of the research on the role of contextual factors for quality and safety work is related to quality improvement interventions and implementation. It is important to explore how contextual factors affect managers' daily quality and safety work, whether they are implementing specific improvement interventions



1  
2  
3 or not. Given this research gap, exploring which contextual factors are salient for daily quality  
4 and safety work in the primary care setting is needed.  
5  
6

### 7 **Aim and research question**

8  
9  
10 The purpose of this study is to generate new knowledge about the contextual factors that  
11 influence managers' quality and safety work in Norwegian home care and nursing homes.  
12 This study answered the following research question: How do contextual factors influence  
13 quality and safety work in the Norwegian home care and nursing home settings? By  
14 answering this question, the study contributes to a better understanding of quality and safety  
15 improvement processes in Norwegian primary care as it occurs in everyday work.  
16  
17  
18  
19

### 20 **METHODS**

21 The study uses a qualitative explorative design [12].  
22  
23

#### 24 **Recruitment and sample**

25  
26 We recruited a purposive sample of nine middle- and top-level managers in primary care. The  
27 sample includes managers from five municipalities, located in three counties in different  
28 regions of Norway. The selection criteria were based on diversity in managerial role,  
29 responsibility, and a variety of counties and municipalities, to ensure that the sample  
30 represented a variety in contextual settings. Exclusion criteria was managers' representing  
31 municipalities that were going to take part in a planned intervention in the same project (see  
32 below). Our sample consisted of four managers from nursing homes, four from home care  
33 services, and one director of health and care services in a municipality (see Table 1). All  
34 participants were females aged 34-61 years, with three to 19 years of managerial experience.  
35 The municipalities, nursing homes, and home care services represented in our sample differ in  
36 size, location (urban/rural) and structure. The managerial levels span from the municipality  
37 level (one director of health and care services), followed by unit managers of the nursing  
38 home and home care services (n=2), and department managers with personnel responsibility  
39 of one or several departments within the nursing homes and home care service (n=4). Also  
40 included in the sample are professional development nurses with responsibility for the daily  
41 operations within specific departments (n=2). They do not manage personnel and or have  
42 administrative responsibility, but often play a key role in quality and safety.  
43  
44  
45  
46  
47  
48  
49  
50  
51  
52  
53  
54  
55  
56  
57  
58  
59  
60

**Table 1.** Participant background information

| P* | Unit               | Professional title                                                                                                                          | Age group | Size of municipality (nr. of inhabitants) | Education/work experience                                                                                                                                                                                        |
|----|--------------------|---------------------------------------------------------------------------------------------------------------------------------------------|-----------|-------------------------------------------|------------------------------------------------------------------------------------------------------------------------------------------------------------------------------------------------------------------|
| 1  | Municipality level | Director of health and care services (responsible for all municipality health care services, including nursing home and home care services) | 45-50     | < 5000                                    | Education: Registered nurse.<br>Years of experience: 24<br>Years in current position: 8                                                                                                                          |
| 2  | Nursing home       | Unit manager                                                                                                                                | 51-55     | 130-135000                                | Education: Registered nurse. Continuing professional education in geriatrics and management<br>Years of experience: 27<br>Years in current position: 18                                                          |
| 3  | Nursing home       | Department manager                                                                                                                          | 46-50     | 15-20000                                  | Education: Registered nurse.<br>Years of experience: 22 (10 years in management)<br>Years in current position: 1,5                                                                                               |
| 4  | Home care          | Department manager                                                                                                                          | 56-50     | 10-15000                                  | Education: Registered nurse. Master's Degree in Organizational management<br>Years of experience: 21 (many years as manager)<br>Years in current position: 2                                                     |
| 5  | Home care          | Professional development nurse                                                                                                              | 31-35     | 10-15000                                  | Education: Registered nurse. Continuing professional education in cognitive therapy, geriatrics and management<br>Years of experience: 7<br>Years in current position: 3                                         |
| 6  | Nursing home       | Department manager                                                                                                                          | 51-55     | 75-80000                                  | Education: Registered nurse. Continuing professional education in management.<br>Years of experience: Not reported<br>Years in current position: 19                                                              |
| 7  | Home care          | Department manager                                                                                                                          | 61-65     | 20-25000                                  | Education: Registered nurse.<br>Years of experience: Not reported<br>Years in current position: 7                                                                                                                |
| 8  | Nursing home       | Unit manager                                                                                                                                | 36-40     | 20-25000                                  | Education: Registered nurse. Master's Degree in health informatics. Continuing professional education in health management.<br>Years of experience: 15 (9 years in management)<br>Years in current position: 0.5 |
| 9  | Nursing Home       | Professional development nurse                                                                                                              | 36-40     | 20-25000                                  | Education: Registered nurse.<br>Years of experience: Total not reported (12 years in management)<br>Years in current position: 2                                                                                 |

\*participant number

1  
2  
3 Three co-researchers from Center for Development of Institutional and Home Care services in  
4 three Norwegian municipalities recruited the participants through e-mail and telephone. Based  
5 on their knowledge of service provides in their counties, the co-researchers approached and  
6 recruited the managers according to our selection criteria. The researchers then contacted the  
7 participants to establish a relationship, agree upon the time, and place for the interviews. The  
8 study is a part of the larger project: *Improving Quality and Safety in Primary Care –*  
9 *Implementing a Leadership Intervention in Nursing Homes and Home care (SAFE-LEAD)*  
10 that aims at building leadership competence and guide primary care managers in their efforts  
11 to advance and improve vital quality and safety strategies, attitudes, and practices in their  
12 organizations. The participants in the current study were recruited as a part of a first phase in  
13 the SAFE-LEAD project, to explore the role of contextual factors for quality and safety work  
14 in primary care (see Wiig et al. [13] for study protocol) and as a basis for intervention  
15 planning in the project. The participants were informed about the SAFE-LEAD project and  
16 the aim of the current study before participating.  
17  
18  
19  
20  
21  
22  
23  
24  
25  
26  
27

### 28 **Data collection**

29 Data were drawn from semi-structured individual interviews of the nine managers, conducted  
30 in May/June 2017. The interviews took place at the institutions where the managers worked  
31 and were carried out by the author (TJ), two researchers and one co-researcher in the SAFE-  
32 LEAD project. The interview guide included open questions about managers' quality and  
33 safety work, and more specific questions on the importance of factors such as external  
34 demands, economy, and structure inspired by Bate et al.'s [14] Organizing for Quality  
35 framework. We developed the interview guide in close collaboration with co-researchers who  
36 have extensive experience from municipal healthcare services to ensure fit with the contextual  
37 setting. Each interview lasted for about 45 minutes. Only the researcher and the participant  
38 were present during the interview. The interviewer invited the managers to share experiences  
39 and tell stories about how different contextual factors affect their work with quality and  
40 safety. To decide on the sample size we assessed information power by considering the  
41 specificity of the research question, use of theory, the quality of the interviews and the  
42 analysis strategy [15]. The research question in our sample was specific addressing different  
43 contextual factors, and the sample was relevant to explore the question as it consisted of  
44 managers with different backgrounds from different counties and municipalities across  
45 Norway, in addition to varying managerial background and role from nursing homes, home  
46 care, and management levels. Most interviews were information-rich, providing numerous  
47  
48  
49  
50  
51  
52  
53  
54  
55  
56  
57  
58  
59  
60

1  
2  
3 perspectives and nuances on how different contextual factors influence the managers' work  
4 with quality and safety. After nine interviews, we found sufficient information power for a  
5 responsible analysis to explore our study question. Then we had obtained information from  
6 different kind of managerial positions, different types of municipalities, different types of  
7 services, including managers with both long and short work experience. The interviews were  
8 audio-recorded, encrypted and transcribed by the authors and co-researchers. The names of all  
9 participants were removed from their statements prior to transcription.

## 16 **Analysis**

17 To analyze the data, we used Systematic Text Condensation (STC), a thematic, cross-case  
18 analysis strategy [16]. The analysis comprised four steps: (1) reading the transcribed  
19 interviews to obtain a sense of the material and identify preliminary themes, (2) developing  
20 code groups based on the preliminary themes and identify units of meaning related to each  
21 code group, (3) establishing sub-groups in the code groups and condensing the content in each  
22 code group, and (4) synthesizing the content in each code group to reconceptualized  
23 descriptions of how contextual factors influence the participants' work with quality and  
24 safety.

25 In step 1, all project members involved in the data collection, including co-researchers,  
26 participated in identifying the preliminary themes. ER and TJ completed the analysis in steps  
27 2-4 with input and discussion with SW. An excerpt of the analytical process is shown in Table  
28 2.

## 39 **Ethics**

40 The Regional Committees for Research Ethics in Norway found that the study was not  
41 regulated by the Health Research Act. The Norwegian Social Science Data Services approved  
42 the study (NSD, ID 52324). The study followed the Helsinki Declaration, and all participants  
43 gave their written informed consent.

## 49 **Patient and public involvement**

50 Patients were not involved in this study, but patients' and their next-of-kin's perspectives are  
51 central to the SAFE-LEAD project [13]. Patients, service users, and next-of-kin  
52 representatives participated in the SAFE-LEAD project development, and collaborated with  
53 the project team as co-researchers throughout the project period, including recruitment, data  
54  
55  
56  
57  
58  
59  
60

collection, analysis, and dissemination. The results will be disseminated to the participating units through oral presentations, and as a published article.

**Table 2.** Excerpt of the analysis process using Systematic Text Condensation

| Preliminary themes                       | Code group                                                                                                          | Subgroups                                                            | Condensate                                                                                                                                                                                                                                                                                                                                                      | Result section                                                                                                                                                                                                                                                                                                                                                           |
|------------------------------------------|---------------------------------------------------------------------------------------------------------------------|----------------------------------------------------------------------|-----------------------------------------------------------------------------------------------------------------------------------------------------------------------------------------------------------------------------------------------------------------------------------------------------------------------------------------------------------------|--------------------------------------------------------------------------------------------------------------------------------------------------------------------------------------------------------------------------------------------------------------------------------------------------------------------------------------------------------------------------|
| Time<br>Economy<br>Resources<br>Capacity | Lack of resources is a major barrier for managers' work with quality and safety and requires careful prioritization | Lack of time and money is a barrier<br><br>Prioritizing is necessary | Excerpt from the subgroup "Prioritizing is necessary:<br><br><i>I think we get a lot done with the resources we have, what matters is how we prioritize our time. Someone has to have something extra on their list for others to be allowed to work with nursing plans for instance, but we take turns, and then they are positive to work a little extra.</i> | Excerpt from the subgroup "Prioritizing is necessary:<br><br><i>Several of the participants emphasized that despite being under-resourced, they got a great deal done because they were good at allocating resources. They made the best use of their personnel, such as allowing an employee to work with care plans by moving tasks from that employee to another.</i> |

\*Excerpt from the full text section

## RESULTS

Analysis revealed relevant perspectives on how contextual factors influence managers' quality and safety work in nursing homes and home care and how managers maneuver in their work practice to accomplish their tasks. The participants stated that lack of time and money interfered with their work with quality and safety work in Norwegian nursing homes and home care, and that these resources required careful allocation. They also emphasized the importance of networks and competence. Delegation of responsibility among employees helped create motivation, engagement and improved competence in quality and safety work, and ensured that new knowledge reached all employees. External guidelines and demands helped to systematize their work and legitimize the necessity of quality and safety work to their employees, if they were in accordance with daily clinical practice in the organization. These findings will be elaborated below. The section headings refer to the main findings from our study. Quotations are assigned pseudonyms.

### **Lack of resources is a major barrier for managers' work with quality and safety and requires careful prioritization**

Many participants mentioned lack of time and money as important barriers to quality and safety work. Many participants stated that they did not have enough time to comply with the legal requirements, for example regarding documentation, reporting, and patient follow-up. Some said that the time spend on documentation and the need for cost saving often came at the expense of both patient care and quality and safety work. We should be able to take care of patients and stay within the budget, they said. Money was tight and there was little available for anything outside of daily operations. One participant said that their unit had \$2390 to spend on the health, safety and working environment, but a person lift alone costs \$2014. Many participants observed that staffing was difficult and that they could not hire temporary personnel for night shifts. Nor did they have the funds to purchase the technological systems they wanted. The participants wanted a slightly larger budget so that they could add a few more hours each month in order to meet the demands of their quality and safety work. A participant working for eight years as Director of health and care services for eight years in a small rural municipality expressed it as follows:

“There is limited time for care. The other things are also important, but when one is given more and more tasks and fewer resources, some things clash, and then it is only half done”. (Participant 1).

Several of the participants emphasized that despite being under-resourced, they got a great deal done because they were good at allocating resources. They made the best use of their personnel, such as allowing an employee to work with care plans by moving tasks from that employee to another. Some participants told they had to work systematically with the resources that they had and to set realistic goals. For example, they were not able to hold large professional seminars as often as they liked, so instead they concentrated on quality and safety in the day-to-day care work. A few of the participants stated that despite operating deficits in the municipalities, they had their budgets and their employees, and thus it did not cost more or less, but depended on themselves initiating the quality and safety improvement efforts. Many emphasized the importance of working creatively within the economic scope they had. As long as they adhered to the total budget, they could use funds as they saw fit. For example, one of the participants said that based on complaints from patients and next of kin in one department, they bought furniture and flowers with money that had actually been reserved

1  
2  
3 for another department that did not need it. It was all about doing the right things at the right  
4 time, as illustrated by a quote from a participant working at a short-term rehabilitation and  
5 palliative care department:  
6  
7

8  
9 “Sometimes I think this intervention could be good, but then there is so much else  
10 going on in the department that it is not the right time to do it. You have to pick your  
11 fights carefully. The right actions in the right time”. (Participant 3).  
12  
13  
14

### 15 **Access to networks play an important role in the quality and safety work**

16  
17 Several of the participants reiterated the importance of networks and support for professional  
18 and academic development. We are not born managers, one of them said, and many others  
19 stressed the need for professional input, more and better skills and competence in quality and  
20 safety work, and someone to offer encouragement. They reported several ways of working  
21 with competence development in their unit or department, such as hosting in-house seminars  
22 and workshops with quality and safety work on the agenda. Others had brought all of the unit  
23 managers together to collaborate on quality and safety issues. One of the participants said that  
24 in their last manager meeting they discussed how to handle aggressive patients. The solution  
25 was to give some of the staff special training.  
26  
27  
28  
29  
30  
31  
32  
33

34 The participants also stressed the importance of support from networks and resource persons  
35 in the municipality, such as professional development nurses, nursing home doctors, and the  
36 Center for Development of Institutional and Home Care Services in each county. The nursing  
37 home doctor led the dialogue with patients/users and next of kin, and was an important  
38 discussion partner when it came to quality and safety challenges. The nursing home doctor  
39 was also responsible for much of the in-house teaching and new employee training. The  
40 professional development nurse was a driving force in quality improvement that kept the  
41 managers up-to-date. Most of the participants had an interdepartmental quality committee,  
42 with professional development nurses under supervision of the District Medical Officer in the  
43 municipality (the highest-ranked doctor in the municipal structure). However, sometimes the  
44 committee proposed too many activities that took time away from their daily work, resulting  
45 in time pressure and stress. When this happened, the committee became more of a burden  
46 than a support, they said. The participants did note the value of having support services such  
47 as physiotherapists, ergonomics, psychiatry and the medical center nearby, and some even  
48 had it in the same building. During a busy workday, this was a timesaver for participants who  
49 could just stop by as needed. Likewise, the informal meeting arenas between the unit  
50  
51  
52  
53  
54  
55  
56  
57  
58  
59  
60

1  
2  
3 managers, such as meeting for lunch or coffee was an important support. A participant with  
4 10 years of experience as a healthcare manager describes the importance of collaborating with  
5 other managers and employees:  
6  
7

8  
9 “I believe that we have to work together. As a manager, I can have the vision, but  
10 when I, as a manager, am responsible for the shifts and many other things, it is  
11 important for someone else to pull me up so that we can discuss things”. (Participant  
12 3).  
13  
14  
15  
16

### 17 **Delegation of responsibility ensures that new knowledge reaches the employees**

18  
19 The participants mentioned the delegation of roles and responsibility to employees as  
20 important to create motivation, engagement and improved competence in quality and safety  
21 work. Since the participants did not have the capacity to teach all of the employees how to  
22 implement new procedures, they gave employees responsibility for different areas. The  
23 participants then facilitated and made sure that the employees got time to take courses and  
24 training in their areas of responsibility. To get responsibility for an area, the employee had to  
25 communicate well with his/her colleagues, take courses, keep updated and introduce new  
26 competences and routines to the department. Several participants said they were confident in  
27 knowing that there was a person with special competence in a certain area. One participant  
28 stated that it was not the manager but the employees who were the experts, because they were  
29 on the floor every day. In this connection, several mentioned the importance of having a  
30 highly qualified professional staff. Many participants had put together a resource group to  
31 work on new routines and interventions, which were then discussed in the quality committee.  
32 For example, one participant told that they lacked a clear routine regarding the rinsing rooms,  
33 and then challenged the hygiene group to make a proposal. The participants also stressed the  
34 importance of engaging the employees from the beginning when implementing something.  
35 For example, they encountered resistance when patients wanted to change a mealtime from  
36 afternoon to midday. The managers then had to collaborate with the employees, give them  
37 more time, and work with attitudes and information to ensure that the employees accepted the  
38 change. As one participant said, change cannot be imposed from the top but has to be driven  
39 from the bottom. The director of health and care services in a small municipality reiterated the  
40 importance of giving employees an area of responsibility:  
41  
42  
43  
44  
45  
46  
47  
48  
49  
50  
51  
52  
53  
54  
55  
56  
57  
58  
59  
60



1  
2  
3 “Most have their area of responsibility. It is nutrition, medical reviews, palliative care,  
4 diabetes. As such, the vast majority have their area, but we try to give them an area of  
5 interest. And then we see that it becomes engagement around this”. (Participant 1).  
6  
7  
8

9 Despite making the best use of the resources at hand, the participants stressed the problem  
10 posed by the lack of proper professional competence. One participant had worked in a  
11 hospital setting before, where she could consult with an outpatient clinic nearby, but such  
12 services were nonexistent in the municipalities. Many participants said they strived to have  
13 the right competence at the right place, for instance, not assigning medical tasks to assistants.  
14 Some considered not using assistants at all in home care services. However, when many  
15 employees were out on sick leave it was harder to get nurses or healthcare workers instead of  
16 assistants to take extra shifts. This was a serious problem, they said, since the assistants did  
17 not know the routine. A few participants even stressed the importance of having  
18 professionally trained staff, insisting that it was unacceptable to have only unskilled workers  
19 on duty. One of the participants recounted an incident in which an assistant had failed to  
20 notice that a patient was having difficulty breathing. The assistant mistakenly believed that  
21 eating blueberries had turned the patient’s lips blue. Several participants wanted to replace  
22 some of the assistants with nurses who were capable of handling most of the departmental  
23 tasks. There was a problem, however, with recruiting nurses, especially for temporary  
24 positions, as shown in a quote from a manager who had worked in the same nursing home for  
25 18 years:  
26  
27  
28  
29  
30  
31  
32  
33  
34  
35  
36  
37  
38

39 “Nurses do not grow on trees, so to speak. It's hard to recruit. September last year was  
40 the first time since I started as a manager that we had full nursing coverage (...). But it  
41 did not last long. Things happen all the time. If we lose nurses, we also lose the  
42 competence they have. And then one must start all over again”. (Participant 2).  
43  
44  
45  
46

### 47 **External demands can facilitate oversight and a systematic approach in improvement** 48 **work if they are in accordance with daily clinical practice in the organization** 49

50  
51 Participants reported that external demands such as national guidelines and regulations  
52 contributed to systematize their work, and justified the necessity of the quality and safety  
53 work. They explained the benefits of the national patient safety program, dashboard meetings,  
54 ethical reflection, and development of checklists. Some pointed out that working with  
55 checklists was demanding but necessary for high-quality service provision. Furthermore,  
56 structured documentation was necessary to show the local politicians that they had tried  
57  
58  
59  
60

1  
2  
3 everything else, and was often the only way to make their elected officials understand their  
4 needs and allocate more resources, they said.  
5  
6

7 When governmental white papers were specific i.e. stated what skills would most likely be  
8 needed in the future, the participants found it easier to act upon it. They experienced greater  
9 understanding among local politicians, employees, and users when they had support from  
10 white papers and reports. For example regarding changes in the use of health technology, the  
11 participants experienced increased compliance among employees when they could cite a  
12 white paper. A participant working in a rural home care explained how implementation of  
13 new guidelines anchored in a white paper helped her focus on quality improvement:  
14  
15  
16  
17  
18  
19

20 “I feel it helps me a lot that it is decided from the top level [Parliament] that Norway  
21 wants it that way. That’s true. Yes, we just have to adjust and then change practice  
22 according to this. Now it is decided that the patient shall receive more [services], and  
23 then we have to work towards it and help employees to cope with these changes”.  
24  
25  
26  
27 (Participant 4).  
28  
29

30 The participants stated that political decisions in the municipality and administration affected  
31 them because there were not enough resources and a lack of understanding of what was  
32 required. Participants talked about the mismatch between legal requirements and daily  
33 practice and the contextual factors at their workplace, which could lead to misunderstandings  
34 and substandard quality. For example, some participants reported that the municipality  
35 wanted consistent standard procedures for medication throughout the municipality so that it  
36 would be easier to rotate employees. However, the participants did not find it useful since  
37 each unit had its own routine. Some said they would like to meet the politicians to talk about  
38 how they did their daily work “on the shop floor” which was often quite different from what  
39 the politicians imagined. The participants expressed that politicians should be better informed  
40 about what is happening in the clinical practice, not promising too much, but rather have an  
41 open door and listen to arguments. Many stated that there is a need for more qualified  
42 professionals in the future to work smarter and more efficiently, and that politicians have to  
43 say something about what to do less of. A participant working in a middle-sized urban nursing  
44 home expressed this as follows:  
45  
46  
47  
48  
49  
50  
51  
52  
53  
54

55  
56 “I wish the politicians were clear about what they really expect and what to achieve to  
57 ensure the quality they seek. I feel that if a politician says something, others are just  
58 jumping after”. (Participant 2).  
59  
60

## DISCUSSION

This study explored how contextual factors influence quality and safety work in the Norwegian home care and nursing home settings. Our analysis demonstrated that lack of resources is a major barrier for managers' quality and safety work, and requires careful prioritizing. Access to networks and necessary competence play an important role in quality and safety work, and delegation of responsibility ensures that new knowledge reaches all employees. External guidelines and demands help to systematize managers' quality and safety work, as long as they are in accordance with daily clinical practice in the organization.

The contextual factors that the managers in our study emphasized as important for quality and safety work are similar to those reported in other studies, reviews and implementation frameworks [1, 5, 6, 17, 18]. However, we explore the role of contextual factors in relation to managers' daily quality and safety work, not specifically according to quality improvement initiatives. Most of the previous research on quality and safety work in healthcare was conducted in hospitals [3, 19]. Our study explores the perspectives of managers at different levels in the primary care setting, including units varying in size and location. Furthermore, most previous studies are either quantitative, or reviews of quantitative studies [4]. Our study adds new qualitative knowledge regarding *how* managers in primary care find different contextual factors influencing their quality and safety work, and how they shape the context in which they work. This shows that context is not independent from the actors within the different primary care units, but is actually something that can be changed, acted upon and negotiated to improve the environmental conditions for quality and safety. Rosness et al. [20] describes this as a "sender-receiver metaphor" in which managers can be considered as actors who may resist, co-create or re-create the environmental conditions for their own quality and safety work.

Our findings are in accordance with those in the systematic review by Kaplan et al. [4], who found that associations between funding and quality improvement were often not significant. In light of our findings, this might be because managers' ability to prioritize the available resources is more important than the resources themselves. Our findings indicate that managers' strategies and skills in prioritizing resources, partly by involving and listening to their staff's opinions on how resources should be used, are more important than the actual amount of resources available. The importance of managers' capabilities to change, negotiate, or act upon their context is also revealed in our findings about how managers delegated

1  
2  
3 responsibility for specific fields to different employees, ensuring motivation and knowledge  
4 sharing among staff. The managers' role in acting upon their surrounding context was also  
5 evident in their interaction with politicians, and the way they used the local budget to fit their  
6 needs. This is consistent with Bovenkamp et al. [21] who use the concept of institutional work  
7 when describing how managers both influence and are influenced by their institutional  
8 context.  
9  
10  
11  
12

13  
14 Many studies about the role of contextual factors for quality and safety improvement have  
15 found that external guidelines and demands play an important role [5, 18, 22]. The absence of  
16 such guidelines is an impediment to the implementation of improvement interventions [18].  
17 The current study adds to this body of knowledge, by showing that external guidelines and  
18 demands should be consistent with daily clinical practice in the organization to contribute to  
19 the managers' quality and safety work. Carlford et al. [22] also found that routines should be  
20 taken into account when incorporating new methods, guidelines or tools into primary health  
21 care to ensure compatibility.  
22  
23  
24  
25  
26  
27

### 28 **Strengths and limitations**

29  
30  
31 This study context could have resulted in positive response bias, especially regarding  
32 individual factors in which the managers have a responsibility and a possibility to influence.  
33 However, we highlighted that the purpose of our study was not to evaluate their quality and  
34 safety practices, but to generate knowledge of contextual factors important for their daily  
35 quality and safety work.  
36  
37  
38  
39

40  
41 Despite the small sample, the participants had specific experiences and perceptions about the  
42 research question, which provided rich data and sufficient information power [15]. A larger  
43 sample could potentially added more and stronger information if we had approached  
44 additional municipalities or other service types beyond nursing homes and home care, but it is  
45 our assessment that the sample was acceptable for exploring the scope of our study. The  
46 sample was diverse in age, position, work experience, type of unit (home care and nursing  
47 home), the size and location of both the municipalities and the units in which the managers  
48 worked. This diversity brought a range of perspectives and nuances to the data. We did not  
49 include employees, who might have held opinions that differed from the managers'. We  
50 limited the scope of our study to managers because they have the main responsibility for daily  
51 quality and safety practices. We recommend that further studies explore employees'  
52 perspectives.  
53  
54  
55  
56  
57  
58  
59  
60

1  
2  
3 Given the qualitative nature of our study, the list of important contextual factors addressed is  
4 not exhaustive. However, the factors described are in accordance with other studies of the role  
5 of contextual factors for quality and safety work, illustrating that these factors are found  
6 across settings and samples. Thus the contextual factors described by the participants as  
7 promoting or inhibiting their quality work are probably transferable to other units and  
8 healthcare services.  
9  
10  
11  
12

### 13 14 **Conclusions and implications**

15  
16 This study shows how contextual factors influence quality and safety work in nursing homes  
17 and home care services. The study contributes to a better understanding of quality and safety  
18 improvement processes in Norwegian primary care as it occurs in everyday work. The  
19 findings indicate that managers play an important role in acting upon and negotiating the  
20 contextual environment in which their daily quality and safety work are carried out. The  
21 healthcare sector is in constantly pressure of time and limited resources, and some units might  
22 be better than others at making the best use of these limited resources, for quality work.  
23 Through this study, we have generated knowledge on how contextual factors might influence  
24 the way in which managers perform high-quality work despite contextual barriers, and how  
25 they are actors in shaping the context in which they work. Such knowledge can be useful to  
26 other primary care units, and to other healthcare services. Research on quality and safety work  
27 in the Norwegian primary care context is still limited, and more studies should be conducted  
28 to explore how managers and employees in the primary care setting act upon their contextual  
29 environment and shape the context in favor of care quality and safety.  
30  
31  
32  
33  
34  
35  
36  
37  
38  
39  
40

41 Qualitative studies can contribute to a more complete understanding of how context influence  
42 quality and safety work, and how healthcare units can manage contextual barriers at the local  
43 level. Knowledge of these issues is important for understanding daily work practices, for  
44 identifying possible barriers and facilitators, and when preparing and conducting  
45 improvement interventions, to increase the probability of sustainable and transferable effects  
46 of improvement efforts.  
47  
48  
49  
50  
51  
52  
53  
54  
55  
56  
57  
58  
59  
60

## DECLARATIONS

### Competing interests

The authors declare that they have no competing interests.

### Funding

The work is part of the project Improving Quality and Safety in Primary Care – Implementing a Leadership Intervention in nursing homes and home care (SAFE-LEAD Primary Care), which has received funding from the Research Council of Norway’s program HELSEVEL, under grant agreement 256681/H10, and the University of Stavanger.

### Authors' contributions

All authors contributed to the conception and design of the manuscript. TJ collected the data. ER and TJ conducted the systematic text condensation analysis, although SW was involved in step 1 of the analysis, in addition to discussion and refining of the results. ER made the first draft of the manuscript, while TJ and SW have critically reviewed and revised the subsequent drafts. All authors read and approved the final manuscript.

### Acknowledgement

We thank all participants in the study for sharing their knowledge and experiences with us. We acknowledge the following members of the SAFE-LEAD Primary Care team for participating with discussion on the first step of analysis: Karina Aase, Torunn Strømme, Lene Schibevaag, Berit Ullebust, Line Hurup Thomsen, and Elisabeth Holen-Rabbersvik. Special thanks to Torunn Strømme, Lene Schibevaag, and Berit Ullebust for their contribution with data collection.

### Availability of data and material

Anonymized data of the study will be stored at the Norwegian Social Science Data Services until the project is completed, and will then be available on request.

## REFERENCES

1. Krein SL, Damschroder LJ, Kowalski CP, et al. The influence of

- organizational context on quality improvement and patient safety efforts in infection prevention: a multi-center qualitative study. *Soc Science Med.* 2010;71(9):1692-701.
2. Ministry of Health and Care Services. Meld. St. 26 (2014-2015) Fremtidens primærhelsetjeneste – nærhet og helhet. Oslo: Ministry of Health and Care Services; 2014.
  3. Vincent C, Amalberti R. Safer healthcare. London: Springer Open 2016.
  4. Kaplan HC, Brady PW, Dritz MC, et al. The influence of context on quality improvement success in health care: a systematic review of the literature. *Milbank Q.* 2010;88(4):500-59.
  5. Damschroder LJ, Aron DC, Keith RE, et al. Fostering implementation of health services research findings into practice: a consolidated framework for advancing implementation science. *Implement Sci.* 2009; doi:10.1186/1748-5908-4-50.
  6. McDonald KM. Considering context in quality improvement interventions and implementation: concepts, frameworks, and application. *Acad pediatr.* 2013;13(6):S45-S53.
  7. Øvretveit J. Understanding the conditions for improvement: research to discover which context influences affect improvement success. *BMJ Qual Saf.* 2011; doi:10.1136/bmjqs.2010.045955.
  8. Rycroft-Malone J. The PARIHS framework—A framework for guiding the implementation of evidence-based practice. *J Nurs Care Qual.* 2004;19(4):297-304.
  9. Birken SA, Powell BJ, Presseau J, et al. Combined use of the Consolidated Framework for Implementation Research (CFIR) and the Theoretical Domains Framework (TDF): a systematic review. *Implement Sci.* 2017; doi:10.1186/s13012-016-0534-z.
  10. Glasgow RE, Vogt TM, Boles SM. Evaluating the public health impact of health promotion interventions: the RE-AIM framework. *Am J Public Health.* 1999;89(9):1322-7.
  11. Pfadenhauer LM, Gerhardus A, Mozygemba K, et al. Making sense of complexity in context and implementation: the Context and Implementation of Complex Interventions (CICI) framework. *Implement Sci.* 2017; doi:10.1186/s13012-017-0552-5.
  12. Malterud K. Kvalitative metoder i medisinsk forskning. En innføring. 3 ed. Oslo: Universitetsforlaget 2009.
  13. Wiig S, Ree E, Johannessen T, et al. Improving quality and safety in nursing homes and home care: the study protocol of a mixed-methods research design to implement a leadership intervention. *BMJ Open.* 2018; doi: 10.1136/bmjopen-2017-020933.
  14. Bate P, Mendel P, Robert G. Organizing for quality: the improvement journeys of leading hospitals in Europe and the United States: Radcliffe Publishing 2008.
  15. Malterud K, Siersma VD, Guassora AD. Sample size in qualitative interview studies: guided by information power. *Qual Health Res.* 2016;26(13):1753-60.
  16. Malterud K. Systematic text condensation: a strategy for qualitative analysis. *Scand J Pub Health.* 2012;40(8):795-805.
  17. Kaplan H, Provost L, Froehle C, et al. The Model for Understanding Success in Quality (MUSIQ): building a theory of context in healthcare quality improvement. *BMJ Qual Saf.* 2011;21.
  18. Gjesten MT, Wiig S, Testad I. What are the key contextual factors when preparing for successful implementation of assistive living technology in primary elderly care? A case study from Norway. *BMJ Open.* 2017; doi:10.1136/bmjopen-2016-015455.
  19. Jha A, Prasopa-Plaizier N, Larizgoitia I, et al. Patient safety research: an overview of the global evidence. *Qual Saf Health Care.* 2010;19(1):42-7.
  20. Rosness R, Blakstad HC, Forseth U, et al. Environmental conditions for safety

1  
2  
3 work—Theoretical foundations. *Saf Sci*. 2012;50(10):1967-76.

4 21. van de Bovenkamp HM, Stoopendaal A, Bal R. Working with layers: The governance and  
5 regulation of healthcare quality in an institutionally layered system. *Public Policy and*  
6 *Administration*. 2017;32(1):45-65.

7  
8 22. Carlford S, Lindberg M, Bendtsen P, Nilsen P, Andersson A. Key factors influencing  
9 adoption of an innovation in primary health care: a qualitative study based on  
10 implementation theory. *BMC Fam Pract*. 2010; doi:10.1186/1471-2296-11-60.  
11  
12  
13  
14  
15  
16  
17  
18  
19  
20  
21  
22  
23  
24  
25  
26  
27  
28  
29  
30  
31  
32  
33  
34  
35  
36  
37  
38  
39  
40  
41  
42  
43  
44  
45  
46  
47  
48  
49  
50  
51  
52  
53  
54  
55  
56  
57  
58  
59  
60

For peer review only



## COREQ (CONsolidated criteria for REporting Qualitative research) Checklist

A checklist of items that should be included in reports of qualitative research. You must report the page number in your manuscript where you consider each of the items listed in this checklist. If you have not included this information, either revise your manuscript accordingly before submitting or note N/A.

| Topic                                          | Item No. | Guide Questions/Description                                                                                                                              | Reported on Page No. |
|------------------------------------------------|----------|----------------------------------------------------------------------------------------------------------------------------------------------------------|----------------------|
| <b>Domain 1: Research team and reflexivity</b> |          |                                                                                                                                                          |                      |
| <i>Personal characteristics</i>                |          |                                                                                                                                                          |                      |
| Interviewer/facilitator                        | 1        | Which author/s conducted the interview or focus group?                                                                                                   |                      |
| Credentials                                    | 2        | What were the researcher's credentials? E.g. PhD, MD                                                                                                     |                      |
| Occupation                                     | 3        | What was their occupation at the time of the study?                                                                                                      |                      |
| Gender                                         | 4        | Was the researcher male or female?                                                                                                                       |                      |
| Experience and training                        | 5        | What experience or training did the researcher have?                                                                                                     |                      |
| <i>Relationship with participants</i>          |          |                                                                                                                                                          |                      |
| Relationship established                       | 6        | Was a relationship established prior to study commencement?                                                                                              |                      |
| Participant knowledge of the interviewer       | 7        | What did the participants know about the researcher? e.g. personal goals, reasons for doing the research                                                 |                      |
| Interviewer characteristics                    | 8        | What characteristics were reported about the interviewer/facilitator? e.g. Bias, assumptions, reasons and interests in the research topic                |                      |
| <b>Domain 2: Study design</b>                  |          |                                                                                                                                                          |                      |
| <i>Theoretical framework</i>                   |          |                                                                                                                                                          |                      |
| Methodological orientation and Theory          | 9        | What methodological orientation was stated to underpin the study? e.g. grounded theory, discourse analysis, ethnography, phenomenology, content analysis |                      |
| <i>Participant selection</i>                   |          |                                                                                                                                                          |                      |
| Sampling                                       | 10       | How were participants selected? e.g. purposive, convenience, consecutive, snowball                                                                       |                      |
| Method of approach                             | 11       | How were participants approached? e.g. face-to-face, telephone, mail, email                                                                              |                      |
| Sample size                                    | 12       | How many participants were in the study?                                                                                                                 |                      |
| Non-participation                              | 13       | How many people refused to participate or dropped out? Reasons?                                                                                          |                      |
| <i>Setting</i>                                 |          |                                                                                                                                                          |                      |
| Setting of data collection                     | 14       | Where was the data collected? e.g. home, clinic, workplace                                                                                               |                      |
| Presence of non-participants                   | 15       | Was anyone else present besides the participants and researchers?                                                                                        |                      |
| Description of sample                          | 16       | What are the important characteristics of the sample? e.g. demographic data, date                                                                        |                      |
| <i>Data collection</i>                         |          |                                                                                                                                                          |                      |
| Interview guide                                | 17       | Were questions, prompts, guides provided by the authors? Was it pilot tested?                                                                            |                      |
| Repeat interviews                              | 18       | Were repeat interviews carried out? If yes, how many?                                                                                                    |                      |
| Audio/visual recording                         | 19       | Did the research use audio or visual recording to collect the data?                                                                                      |                      |
| Field notes                                    | 20       | Were field notes made during and/or after the interview or focus group?                                                                                  |                      |
| Duration                                       | 21       | What was the duration of the interviews or focus group?                                                                                                  |                      |
| Data saturation                                | 22       | Was data saturation discussed?                                                                                                                           |                      |
| Transcripts returned                           | 23       | Were transcripts returned to participants for comment and/or                                                                                             |                      |

| Topic                                  | Item No. | Guide Questions/Description                                                                                                        | Reported on Page No. |
|----------------------------------------|----------|------------------------------------------------------------------------------------------------------------------------------------|----------------------|
|                                        |          | correction?                                                                                                                        |                      |
| <b>Domain 3: analysis and findings</b> |          |                                                                                                                                    |                      |
| <i>Data analysis</i>                   |          |                                                                                                                                    |                      |
| Number of data coders                  | 24       | How many data coders coded the data?                                                                                               |                      |
| Description of the coding tree         | 25       | Did authors provide a description of the coding tree?                                                                              |                      |
| Derivation of themes                   | 26       | Were themes identified in advance or derived from the data?                                                                        |                      |
| Software                               | 27       | What software, if applicable, was used to manage the data?                                                                         |                      |
| Participant checking                   | 28       | Did participants provide feedback on the findings?                                                                                 |                      |
| <i>Reporting</i>                       |          |                                                                                                                                    |                      |
| Quotations presented                   | 29       | Were participant quotations presented to illustrate the themes/findings?<br>Was each quotation identified? e.g. participant number |                      |
| Data and findings consistent           | 30       | Was there consistency between the data presented and the findings?                                                                 |                      |
| Clarity of major themes                | 31       | Were major themes clearly presented in the findings?                                                                               |                      |
| Clarity of minor themes                | 32       | Is there a description of diverse cases or discussion of minor themes?                                                             |                      |

Developed from: Tong A, Sainsbury P, Craig J. Consolidated criteria for reporting qualitative research (COREQ): a 32-item checklist for interviews and focus groups. *International Journal for Quality in Health Care*. 2007. Volume 19, Number 6: pp. 349 – 357

**Once you have completed this checklist, please save a copy and upload it as part of your submission. DO NOT include this checklist as part of the main manuscript document. It must be uploaded as a separate file.**
